# Supplementary material
Source: PubMed Central journal article supplement (PMC4862515)
Supplement: AAC.02765-15_zac005165179so1.pdf [file AAC.02765-15_zac005165179so1.pdf]

# Supplementary Figure 1

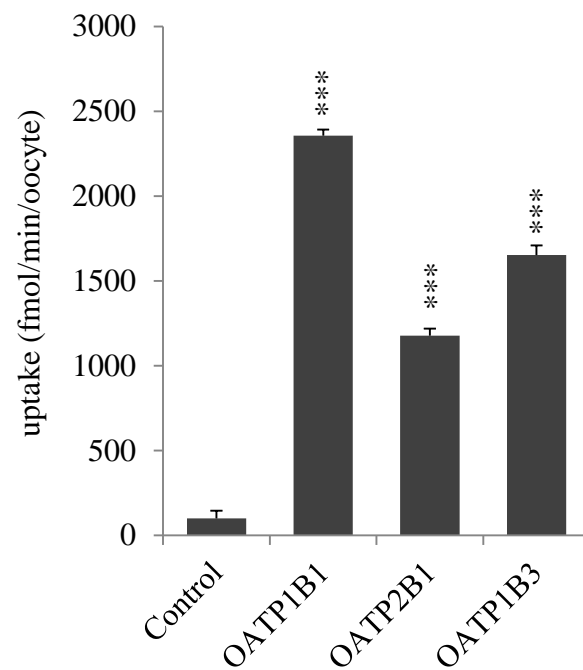

Figure S1. Uptake of 45 nM [ $^3\text{H}$ ]-ES in hOATP1B1- and 60 nM [ $^3\text{H}$ ]-E2G uptake in hOATP1B3 cRNA injected x. oocytes and non-injected cRNA x. oocytes termed as control. The probe substrate uptake showed the cRNA injected x. oocytes were capable to perform further uptake inhibition study. Data represent the mean  $\pm$  SD of three or more independent experiments ( $n = 3$ , \*  $P < 0.05$ , \* \*  $P < 0.01$ , \* \* \*  $P < 0.001$ , significantly different compared with uptake in control).

## Supplementary figure 2

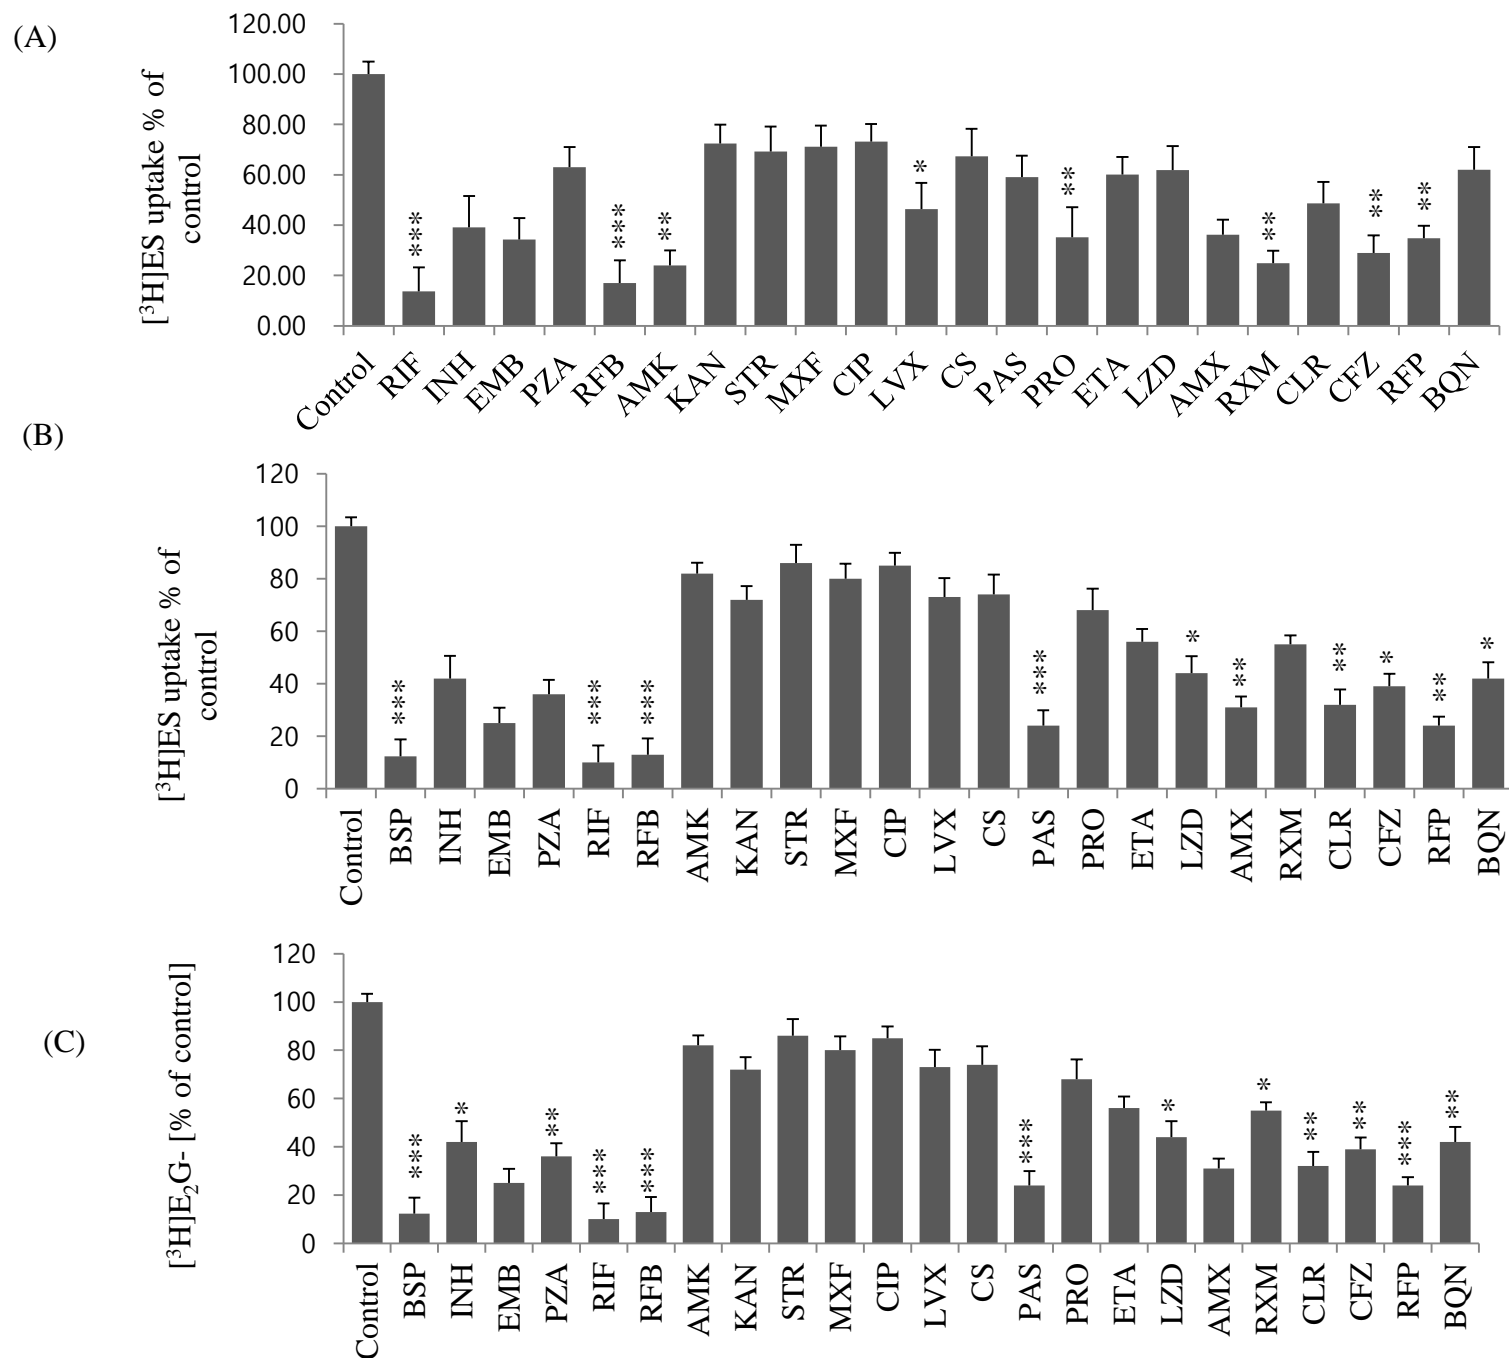

Figure S2. Screening of the inhibitory effects of 22 anti-TB drugs on OATP mediated uptake. (A) 45nM [<sup>3</sup>H]-ES in hOATP1B1 and (B) hOATP1B1 and 60 nM [<sup>3</sup>H]-E2G uptake in hOATP1B3 cRNA injected x. oocytes and noninjected cRNA x. oocytes termed as control. The probe substrate uptake showed the cRNA injected x. oocytes were capable to perform further uptake inhibition study. Data represent the mean ± SD of three or more independent experiments (*n* = 3, \* *P* < 0.05, \*\* *P* < 0.01, \*\*\* *P* < 0.001, significantly different compared with uptake in control).

# Supplementary Figure 3

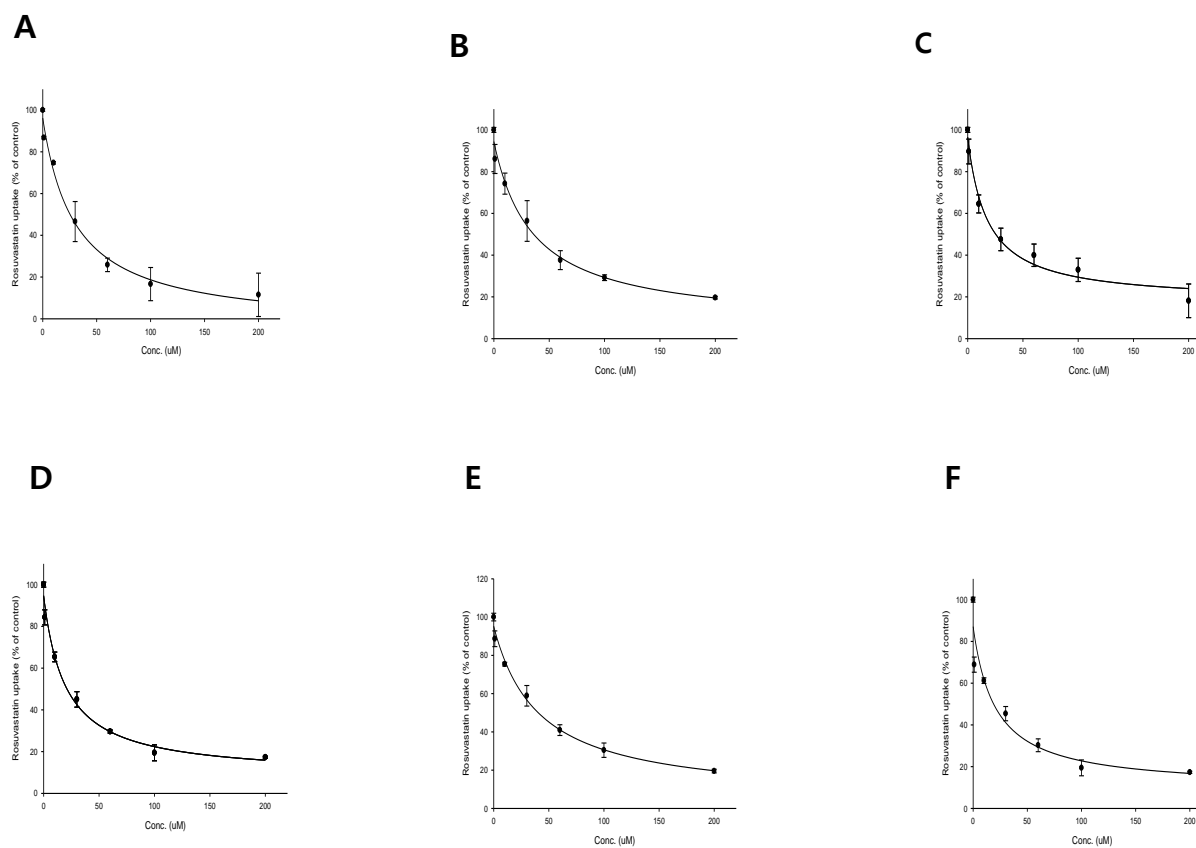

Figure S3. Estimation of inhibitory kinetics ( $IC_{50}$ ) of (A) ethambutol, (B) linezolid, (C) rifapentine, (D) rifabutin, (E) PAS, and (F) amoxicillin on rosuvastatin uptake in hOATP1B1-overexpressing HEK293 cells. The estimated  $IC_{50}$  was calculated by non-linear kinetics using Winnonlin 6.0. Data are presented as the mean value, relative to the control (no inhibitor), of triplicate experiments.

## Supplementary table: 1

Pharmacokinetic parameters of inhibitors used for the calculation of R-values.  $[I]_{u,inlet,max}$  (estimated maximum unbound inhibitor concentrations at the inlet to the liver) of anti-TB drugs, were calculated by the equation, as described under *Materials and Methods*, in which  $k_a$  of 0.1 min<sup>-1</sup>,  $F_a \times F_g$  of 1, and  $Q_h$  of 1500mL/min were used. The blood to plasma concentration ratios of the inhibitors were assumed to be unity in the  $[I]_{u,inlet,max}$  calculations.

| Drugs          | Dose | Fu        | C <sub>max</sub> | $[I]_{u,inlet,max}$ |
|----------------|------|-----------|------------------|---------------------|
|                | mg   | %         | uM               | uM                  |
| PAS            | 8000 | 0.50(42)  | 881(41)          | 1745                |
| Amoxicillin    | 500  | 0.82(49)  | 32.8(48)         | 117.8               |
| Rifampin       | 600  | 0.15(55)  | 23(54)           | 10.7                |
| Rifabutin      | 300  | 0.15(44)  | 0.9(43)          | 3.6                 |
| Ethambutol     | 440  | 0.75(46)  | 22.02(45)        | 310                 |
| Linezolid      | 600  | 0.89(47)  | 52.4(36)         | 25.6                |
| Clofazimine    | 200  | 0.01(53)  | 8.61(52)         | 0.36                |
| Amikacin       | 600  | 0.90(56)  | 126.5(56)        | 175.3               |
| Kanamycin      | 250  | 0.90(58)  | 24.5(57)         | 53.0                |
| Streptomycin   | 800  | 0.65(58)  | 74.9(59)         | 108.3               |
| Roxithromycin  | 150  | 0.10(61)  | 7.88(60)         | 1.92                |
| Clarithromycin | 500  | 0.50(51)  | 48.8(50)         | 46.6                |
| Rifapentine    | 600  | 0.014(62) | 17.7(62)         | 1.78                |

Supplementary table 1. Pharmacokinetic parameters of the anti-TB drugs were collected from clinical studies on healthy and patient populations from the references those were reported by others.
